# Supplementary material
Source: PubMed Central journal article supplement (PMC6373728)
Supplement: NIHMS1515514-supplement-Supp_tables_1-18.pdf [file NIHMS1515514-supplement-Supp_tables_1-18.pdf]

**Supplementary Table 1. Antibody list used in the experiments. Related to Methods section.**

| Antibody             | Species | Dilution | Source             |
|----------------------|---------|----------|--------------------|
| GAD 1                | Rabbit  | 1:1,000  | Millipore          |
| Glutamate            | Rabbit  | 1:15,000 | Sigma Aldrich      |
| PV                   | Rabbit  | 1:5,000  | Swant              |
| PV                   | Sheep   | 1:200    | Thermo Fisher      |
| PSD-95               | Rabbit  | 1:1,000  | Cell Signaling     |
| Vglut1               | Mouse   | 1:1,000  | UC Davis           |
| VGAT                 | Rabbit  | 1:1,000  | Synaptic Systems   |
| Gephyrin             | Mouse   | 1:1,000  | Synaptic Systems   |
| Sox6                 | Rabbit  | 1:1,000  | Millipore          |
| $\beta$ -tubulin III | Mouse   | 1:2,000  | Covance            |
| Oct4                 | Rabbit  | 1:400    | Cell Signaling     |
| Tra-160              | Mouse   | 1:500    | Abcam              |
| GFP                  | Chicken | 1:1,000  | Abcam              |
| NCAM                 | Mouse   | 1:1,000  | Santa Cruz Biotech |
| MEF2C                | Rabbit  | 1:1,000  | Cell Signaling     |
| SST                  | Goat    | 1:1,000  | Santa Cruz Biotech |
| Human Cytoplasm      | Mouse   | 1:1,000  | StemCells Inc      |
| VIP                  | Rabbit  | 1:1,000  | Immunostar         |
| CCK                  | Rabbit  | 1:1,000  | Sigma Aldrich      |
| Calretinin           | Goat    | 1:1,000  | Swant              |
| COUPTFII             | Mouse   | 1:1,000  | Perseus Proteomics |
| OLIG2                | Rabbit  | 1:1,000  | Millipore          |
| GFAP                 | Mouse   | 1:1,000  | UC Davis           |
| ChAT                 | Goat    | 1:1,000  | Chemicon           |
| TH                   | Rabbit  | 1:1,000  | Pel-Freez          |
| 5-HT                 | Rabbit  | 1:1,000  | Immunostar         |

**Supplementary Table 2. Primer list used in this study.** *Related to Methods section.*

| Gene            | Sequence                                    |                           |
|-----------------|---------------------------------------------|---------------------------|
| <i>PCDHA2</i>   | Taqman assay ID: Hs00171012 (Thermo Fisher) |                           |
| <i>PCDHA3</i>   | Forward                                     | GTTTTCGCTAGAGGGCGCAT      |
|                 | Reverse                                     | CAACACGAGTCCAAGGGATTTA    |
| <i>PCDHA6</i>   | Forward                                     | GGAAAGCAATGTCTGCTCCTC     |
|                 | Reverse                                     | CCTCCTCGGGTACGGAGTAG      |
| <i>PCDHA8</i>   | Forward                                     | GTCCTGGTGAAGGATCATGGT     |
|                 | Reverse                                     | GCCTCGATGACGCTTTTGG       |
| <i>PCDHA-CR</i> | Forward                                     | CATTCTACGGGCTGGTCCAG      |
|                 | Reverse                                     | GGGTTGCCTGGTCCGTATTT      |
| <i>PCDHA-CR</i> | Forward                                     | AGCAGTGGCCAACAGTATCC      |
|                 | Reverse                                     | GGTCTCCTCCTTTTTGCCGA      |
| <i>PCDHG-CR</i> | Forward                                     | GGCCCAACAACCAGTTTGAC      |
|                 | Reverse                                     | CGTTGGTCAGTGTGGCATTG      |
| <i>PCDHG-CR</i> | Forward                                     | GGCCCAACAACCAGTTTGAC      |
|                 | Reverse                                     | CGTTGGTCAGTGTGGCATTG      |
| <i>NANOG</i>    | Forward                                     | TTGGGACTGGTGAAGAATC       |
|                 | Reverse                                     | GATTTGTGGGCCTGAAGAAA      |
| <i>PAX6</i>     | Forward                                     | TCAGTTCCAGTTCAAGTTCCCG    |
|                 | Reverse                                     | CAGCCATTTTTCTTTCTTTCTCCTG |
| <i>TBR1</i>     | Forward                                     | ACAATTTTCTGACTCCAAGGAC    |
|                 | Reverse                                     | ACTGTGACGAAGCTCAGAGAC     |
| <i>SLC17A7</i>  | Forward                                     | CTGGGGCTACATTGTCACTCA     |
|                 | Reverse                                     | GCAAAGCCGAAAACCTCTGTTG    |
| <i>GAD1</i>     | Forward                                     | CTGCTCTTCTCTTACGCTCTCTGTC |
|                 | Reverse                                     | TCTTCGGAAATGTTGCCTTAGG    |
| <i>LHX6</i>     | Forward                                     | GGTCTATTCCTTGCGTGGATTATG  |
|                 | Reverse                                     | TCCGTGTGTGTGTTTTCCCC      |
| <i>NKX2-1</i>   | Forward                                     | ACTGACACAAAGGAAGTGCCCC    |
|                 | Reverse                                     | GCCGCAAATACCAAAGTACC      |
| <i>SOX6</i>     | Forward                                     | ATCTCTCATCCCGACCCAAGAC    |
|                 | Reverse                                     | TTCCAGGCTTCTTCCAATG       |
| <i>GAPDH</i>    | Forward                                     | GCTCAGACACCATGGGGAAGGT    |
|                 | Reverse                                     | GTGGTGCAGGAGGCATTG CTGA   |

**Supplementary Table 3. Cell lines used for each experiment. Related to Methods section.**

| Group | Cell ID | Immunocytochemistry | Cell counting | pilot RNAseq | Glutaminergic RNAseq | RNAseq on larger cohort | Real Time PCR | Electrophysiology | Electrophysiology in vitro | Arborization in vivo | GO6893 treatment | siRNA treatment | Synapse analysis after grafting |
|-------|---------|---------------------|---------------|--------------|----------------------|-------------------------|---------------|-------------------|----------------------------|----------------------|------------------|-----------------|---------------------------------|
| HC    | 317     | ✓                   | ✓             |              | ✓                    | ✓                       | ✓             | ✓                 |                            |                      |                  |                 |                                 |
|       | PYAUM   | ✓                   | ✓             |              | ✓                    | ✓                       |               | ✓                 | ✓                          |                      |                  |                 | ✓                               |
|       | 272     | ✓                   | ✓             | ✓            | ✓                    | ✓                       | ✓             |                   | ✓                          | ✓                    |                  |                 | ✓                               |
|       | 190     | ✓                   | ✓             | ✓            | ✓                    | ✓                       |               | ✓                 | ✓                          | ✓                    | ✓                |                 | ✓                               |
|       | 367     | ✓                   | ✓             | ✓            | ✓                    | ✓                       | ✓             |                   | ✓                          | ✓                    | ✓                |                 | ✓                               |
|       | 292     | ✓                   | ✓             |              |                      | ✓                       | ✓             |                   |                            |                      |                  |                 |                                 |
|       | 365     | ✓                   | ✓             |              |                      | ✓                       | ✓             |                   |                            |                      |                  |                 |                                 |
|       | 226     | ✓                   | ✓             | ✓            | ✓                    | ✓                       | ✓             |                   |                            |                      |                  | ✓               |                                 |
|       | M_139   | ✓                   | ✓             |              |                      | ✓                       | ✓             | ✓                 | ✓                          | ✓                    |                  |                 | ✓                               |
|       | 99      | ✓                   | ✓             |              |                      | ✓                       | ✓             |                   | ✓                          | ✓                    |                  |                 | ✓                               |
|       | 107     | ✓                   | ✓             |              |                      | ✓                       | ✓             |                   | ✓                          | ✓                    |                  |                 | ✓                               |
|       | L5      | ✓                   | ✓             |              |                      | ✓                       | ✓             |                   |                            |                      |                  |                 |                                 |
|       | L7      | ✓                   | ✓             |              |                      | ✓                       | ✓             | ✓                 |                            | ✓                    | ✓                |                 |                                 |
|       | L9      | ✓                   | ✓             |              |                      | ✓                       | ✓             |                   |                            |                      |                  |                 |                                 |
| SCZ   | 67      | ✓                   | ✓             | ✓            | ✓                    | ✓                       | ✓             | ✓                 | ✓                          | ✓                    |                  |                 | ✓                               |
|       | 117     | ✓                   | ✓             |              |                      | ✓                       | ✓             | ✓                 | ✓                          | ✓                    |                  |                 |                                 |
|       | 128     | ✓                   | ✓             | ✓            | ✓                    | ✓                       | ✓             |                   | ✓                          | ✓                    |                  | ✓               | ✓                               |
|       | 212     | ✓                   | ✓             | ✓            | ✓                    | ✓                       | ✓             |                   | ✓                          |                      |                  | ✓               |                                 |
|       | 162     | ✓                   | ✓             | ✓            | ✓                    | ✓                       | ✓             |                   | ✓                          | ✓                    | ✓                |                 |                                 |
|       | 58      | ✓                   | ✓             |              |                      | ✓                       | ✓             |                   | ✓                          | ✓                    | ✓                |                 |                                 |
|       | 282     | ✓                   | ✓             |              |                      | ✓                       | ✓             |                   |                            |                      |                  |                 | ✓                               |
|       | 285     | ✓                   | ✓             |              |                      | ✓                       | ✓             | ✓                 |                            | ✓                    | ✓                |                 |                                 |
|       | L8      | ✓                   | ✓             |              |                      | ✓                       | ✓             |                   |                            |                      |                  |                 |                                 |
|       | L10     | ✓                   | ✓             |              |                      | ✓                       | ✓             |                   |                            |                      |                  |                 | ✓                               |
|       | 1442    | ✓                   | ✓             |              |                      | ✓                       | ✓             |                   |                            |                      |                  |                 |                                 |
|       | 483     | ✓                   | ✓             |              |                      | ✓                       | ✓             |                   | ✓                          | ✓                    |                  |                 | ✓                               |
|       | 689     | ✓                   | ✓             |              |                      | ✓                       | ✓             |                   | ✓                          | ✓                    |                  |                 | ✓                               |
|       | 755     | ✓                   | ✓             |              |                      | ✓                       | ✓             |                   | ✓                          | ✓                    | ✓                |                 | ✓                               |

**Supplementary Table 4. Break down data table of Fig. 3c (n= 3 differentiations per cell line).**

|               | Group   | HC cIN |      |      |      | SCZ cIN |      |      |      |
|---------------|---------|--------|------|------|------|---------|------|------|------|
| Gene          | Cell ID | 190    | 226  | 272  | 367  | 128     | 162  | 212  | 67   |
| <i>PCDHA2</i> | Average | 1.46   | 1.71 | 1.76 | 0.81 | 0.38    | 0.57 | 1.22 | 0.23 |
|               | SEM     | 0.11   | 0.78 | 0.33 | 0.15 | 0.04    | 0.13 | 0.39 | 0.06 |

**Supplementary Table 5. Break down data table of Fig. 3f, Supplementary Fig. 8a, and 8f (n= 2 differentiations per cell line).**

| Sample               | Group | Cell ID | <i>PCDHA2</i> |      | <i>PCDHA3</i> |      | <i>PCDHA6</i> |      | <i>PCDHA8</i> |      | <i>PCDHG-CR</i> |      | <i>PCDHA-CR</i> |      |
|----------------------|-------|---------|---------------|------|---------------|------|---------------|------|---------------|------|-----------------|------|-----------------|------|
|                      |       |         | Average       | SEM  | Average       | SEM  | Average       | SEM  | Average       | SEM  | Average         | SEM  | Average         | SEM  |
| Glutamatergic neuron | HC    | 190     | 1.01          | 0.37 | 1.10          | 0.26 | 0.81          | 0.12 | 1.05          | 0.14 | 0.78            | 0.04 | 1.26            | 0.04 |
|                      |       | 226     | 1.12          | 0.65 | 0.73          | 0.23 | 1.37          | 0.52 | 0.95          | 0.00 | 1.20            | 0.44 | 1.05            | 0.16 |
|                      |       | 272     | 1.65          | 1.35 | 1.55          | 1.05 | 4.48          | 1.12 | 2.27          | 0.46 | 1.37            | 0.75 | 2.03            | 0.67 |
|                      |       | 367     | 1.68          | 1.15 | 1.51          | 0.95 | 0.23          | 0.05 | 0.51          | 0.23 | 1.35            | 0.91 | 0.40            | 0.06 |
|                      | SCZ   | 128     | 0.55          | 0.34 | 1.19          | 0.66 | 0.68          | 0.25 | 0.93          | 0.55 | 1.28            | 0.56 | 1.32            | 0.45 |
|                      |       | 162     | 1.12          | 0.43 | 0.75          | 0.12 | 0.82          | 0.14 | 1.13          | 0.18 | 1.75            | 0.53 | 2.60            | 0.59 |
|                      |       | 212     | 1.02          | 0.02 | 0.88          | 0.58 | 2.83          | 1.06 | 1.18          | 0.22 | 1.03            | 0.06 | 1.26            | 0.12 |
|                      |       | 67      | 0.55          | 0.26 | 0.62          | 0.48 | 0.64          | 0.36 | 0.65          | 0.25 | 1.32            | 0.83 | 1.00            | 0.60 |

**Supplementary Table 6. Break down data table of Fig. 4c and Supplementary Fig. 8e (n= 2 differentiations per cell line)**

| Sample | Group | Cell ID | <i>PCDHA2</i> |      | <i>PCDHA3</i> |      | <i>PCDHA6</i> |      | <i>PCDHA8</i> |      | <i>PCDHG-CR</i> |      | <i>PCDHA-CR</i> |      |
|--------|-------|---------|---------------|------|---------------|------|---------------|------|---------------|------|-----------------|------|-----------------|------|
|        |       |         | Average       | SEM  | Average       | SEM  | Average       | SEM  | Average       | SEM  | Average         | SEM  | Average         | SEM  |
| cIN    | HC    | 226     | 3.84          | 0.84 | 2.11          | 1.33 | 1.19          | 0.55 | 4.76          | 1.63 | 2.53            | 1.94 | 2.96            | 2.11 |
|        |       | L9      | 0.22          | 0.17 | 0.45          | 0.05 | 0.62          | 0.25 | 2.52          | 1.23 | 4.05            | 2.48 | 1.38            | 0.40 |
|        |       | 365     | 6.23          | 0.21 | 0.51          | 0.06 | 0.39          | 0.09 | 0.26          | 0.10 | 2.09            | 1.28 | 2.68            | 1.39 |
|        |       | L7      | 0.84          | 0.18 | 0.75          | 0.13 | 1.75          | 0.87 | 1.30          | 0.38 | 1.93            | 0.38 | 2.58            | 0.30 |
|        |       | 292     | 1.60          | 0.31 | 2.11          | 0.18 | 2.07          | 0.27 | 2.11          | 0.04 | 0.85            | 0.01 | 0.72            | 0.14 |
|        |       | M_139   | 2.46          | 2.11 | 1.50          | 0.73 | 2.01          | 0.21 | 1.87          | 0.21 | 1.06            | 0.04 | 0.63            | 0.17 |
|        |       | 367     | 1.10          | 0.47 | 1.89          | 0.57 | 1.84          | 0.25 | 0.66          | 0.25 | 0.12            | 0.02 | 0.36            | 0.09 |
|        |       | 107     | 0.20          | 0.01 | 2.28          | 0.21 | 1.49          | 0.99 | 1.40          | 1.09 | 0.86            | 0.49 | 1.38            | 0.95 |
|        |       | 190     | 2.20          | 0.82 | 1.62          | 1.30 | 2.06          | 1.39 | 1.72          | 1.55 | 1.59            | 0.82 | 1.63            | 0.84 |
|        |       | 99      | 0.89          | 0.65 | 1.61          | 0.78 | 2.05          | 1.67 | 0.77          | 0.62 | 1.57            | 0.58 | 0.95            | 0.05 |
|        |       | 272     | 3.06          | 1.69 | 1.56          | 1.37 | 1.27          | 0.40 | 2.18          | 1.61 | 2.38            | 1.55 | 0.83            | 0.12 |
|        |       | PYAUM   | 1.43          | 0.75 | 0.96          | 0.34 | 2.47          | 1.11 | 0.86          | 0.40 | 0.81            | 0.44 | 2.93            | 1.44 |
|        |       | 317     | 0.54          | 0.35 | 1.04          | 0.54 | 1.13          | 0.06 | 0.98          | 0.42 | 0.39            | 0.07 | 0.52            | 0.05 |
|        | L5    | 0.63    | 0.16          | 0.41 | 0.12          | 0.16 | 0.14          | 0.49 | 0.09          | 0.86 | 0.05            | 0.29 | 0.01            |      |
|        | SCZ   | 285     | 0.45          | 0.23 | 0.46          | 0.22 | 0.57          | 0.55 | 0.16          | 0.03 | 0.38            | 0.08 | 0.79            | 0.06 |
|        |       | L8      | 0.16          | 0.08 | 0.88          | 0.04 | 0.39          | 0.04 | 0.43          | 0.10 | 1.31            | 0.05 | 1.00            | 0.14 |
|        |       | 282     | 0.17          | 0.02 | 1.28          | 0.46 | 1.64          | 0.69 | 0.95          | 0.01 | 0.89            | 0.11 | 0.77            | 0.04 |
|        |       | 755     | 0.60          | 0.48 | 0.44          | 0.12 | 0.84          | 0.11 | 0.67          | 0.23 | 0.82            | 0.01 | 0.75            | 0.09 |
|        |       | 58      | 0.25          | 0.01 | 0.40          | 0.37 | 0.20          | 0.02 | 0.45          | 0.03 | 0.29            | 0.05 | 0.17            | 0.01 |
|        |       | 689     | 0.38          | 0.10 | 0.47          | 0.02 | 0.96          | 0.39 | 0.13          | 0.01 | 0.23            | 0.22 | 0.27            | 0.23 |
|        |       | 162     | 0.32          | 0.01 | 0.65          | 0.35 | 0.41          | 0.03 | 0.71          | 0.40 | 0.40            | 0.00 | 0.64            | 0.09 |
|        |       | 483     | 1.07          | 0.90 | 0.91          | 0.39 | 1.12          | 0.43 | 0.49          | 0.38 | 0.32            | 0.07 | 0.59            | 0.04 |
|        |       | 212     | 0.94          | 0.24 | 0.45          | 0.01 | 0.72          | 0.32 | 1.43          | 0.41 | 0.58            | 0.39 | 0.61            | 0.02 |
| L10    |       | 0.08    | 0.05          | 1.10 | 0.54          | 1.31 | 0.91          | 2.09 | 0.26          | 0.06 | 0.04            | 0.14 | 0.04            |      |
| 128    | 0.36  | 0.01    | 0.41          | 0.06 | 0.43          | 0.38 | 0.87          | 0.50 | 0.33          | 0.11 | 0.56            | 0.10 |                 |      |
| 117    | 0.26  | 0.02    | 0.36          | 0.36 | 1.08          | 0.65 | 0.78          | 0.46 | 0.25          | 0.25 | 0.22            | 0.21 |                 |      |
| 67     | 0.21  | 0.03    | 0.46          | 0.02 | 0.65          | 0.18 | 0.79          | 0.49 | 0.41          | 0.15 | 0.49            | 0.40 |                 |      |
| 1442   | 0.60  | 0.39    | 0.28          | 0.00 | 0.22          | 0.18 | 0.11          | 0.06 | 0.33          | 0.09 | 0.30            | 0.04 |                 |      |

**Supplementary Table 7. Break down data table of Fig. 5a (n= 20 neurons per mouse).**

| Group | Mouse ID | Neurite number from soma |      | Branch number |      | Neurite length |       |
|-------|----------|--------------------------|------|---------------|------|----------------|-------|
|       |          | Average                  | SEM  | Average       | SEM  | Average        | SEM   |
| WT    | 1        | 5.25                     | 0.30 | 9.60          | 0.42 | 552.34         | 20.93 |
|       | 2        | 4.65                     | 0.29 | 8.00          | 0.54 | 486.92         | 27.17 |
|       | 3        | 5.05                     | 0.30 | 9.30          | 0.89 | 498.73         | 48.29 |
|       | 4        | 4.90                     | 0.24 | 10.30         | 0.37 | 510.30         | 18.57 |
|       | 5        | 4.80                     | 0.30 | 12.40         | 0.93 | 484.07         | 36.69 |
| KO    | 1        | 3.80                     | 0.22 | 5.90          | 0.30 | 321.15         | 17.14 |
|       | 2        | 4.65                     | 0.22 | 7.90          | 0.49 | 444.79         | 27.32 |
|       | 3        | 4.15                     | 0.22 | 7.00          | 0.48 | 345.25         | 24.99 |
|       | 4        | 4.45                     | 0.32 | 8.85          | 0.80 | 349.05         | 33.81 |
|       | 5        | 3.55                     | 0.22 | 6.15          | 0.35 | 278.45         | 33.63 |

**Supplementary Table 8. Break down data table of Fig. 5b and 5c (n= five 116  $\mu\text{m}$  x 116  $\mu\text{m}$  images per mouse).**

| Group | Mouse ID | Inhibitory synaptic puncta per 100 $\mu\text{m}^2$ |       | Excitatory synaptic puncta per 100 $\mu\text{m}^2$ |      |
|-------|----------|----------------------------------------------------|-------|----------------------------------------------------|------|
|       |          | Average                                            | SEM   | Average                                            | SEM  |
| WT    | 1        | 38.17                                              | 1.77  | 23.27                                              | 5.65 |
|       | 2        | 49.50                                              | 10.15 | 26.83                                              | 8.85 |
|       | 3        | 46.64                                              | 7.63  | 31.60                                              | 1.71 |
|       | 4        | 27.68                                              | 1.78  | 26.88                                              | 6.49 |
|       | 5        | 41.39                                              | 2.96  | 41.04                                              | 4.17 |
| KO    | 1        | 18.38                                              | 2.43  | 36.24                                              | 7.21 |
|       | 2        | 22.51                                              | 3.25  | 21.98                                              | 6.07 |
|       | 3        | 27.85                                              | 3.57  | 32.47                                              | 3.69 |
|       | 4        | 15.11                                              | 1.27  | 54.29                                              | 5.68 |
|       | 5        | 20.13                                              | 1.09  | 42.07                                              | 8.44 |

**Supplementary Table 9. Break down data table of Fig. 6a (n= 20 neurons per cell line).**

| Group | Cell ID | Neurite number from soma |      | Branch number |      | Neurite length |        |
|-------|---------|--------------------------|------|---------------|------|----------------|--------|
|       |         | Average                  | SEM  | Average       | SEM  | Average        | SEM    |
| HC    | 272     | 4.10                     | 0.35 | 8.80          | 0.88 | 1200.55        | 129.33 |
|       | 190     | 3.65                     | 0.23 | 7.55          | 0.41 | 894.11         | 48.41  |
|       | PYAUM   | 4.05                     | 0.34 | 10.90         | 1.41 | 895.11         | 109.07 |
|       | 107     | 4.45                     | 0.39 | 8.50          | 0.78 | 1638.23        | 146.48 |
|       | 99      | 4.50                     | 0.31 | 8.90          | 0.87 | 1190.18        | 184.62 |
|       | 317     | 4.80                     | 0.43 | 12.05         | 1.41 | 2132.73        | 238.49 |
|       | M_139   | 5.45                     | 0.58 | 9.20          | 1.13 | 1003.60        | 125.11 |
|       | L7      | 5.75                     | 0.36 | 14.45         | 1.04 | 1909.93        | 132.82 |
|       | 367     | 5.65                     | 0.28 | 14.60         | 1.24 | 1827.86        | 141.92 |
| SCZ   | 128     | 2.85                     | 0.35 | 4.45          | 0.43 | 548.54         | 62.05  |
|       | 67      | 2.15                     | 0.13 | 3.45          | 0.25 | 319.89         | 27.77  |
|       | 755     | 4.25                     | 0.43 | 6.60          | 0.92 | 634.22         | 48.01  |
|       | 117     | 3.80                     | 0.48 | 8.35          | 1.02 | 1193.97        | 156.04 |
|       | 689     | 4.05                     | 0.33 | 8.30          | 1.00 | 1201.41        | 133.90 |
|       | 483     | 4.35                     | 0.27 | 7.70          | 0.54 | 1001.38        | 75.02  |
|       | 285     | 3.15                     | 0.27 | 6.30          | 0.60 | 833.89         | 90.13  |
|       | 162     | 4.15                     | 0.22 | 13.15         | 0.97 | 1147.54        | 66.83  |
|       | 58      | 3.75                     | 0.39 | 7.45          | 0.96 | 1127.62        | 156.48 |

**Supplementary Table 10. Break down data table of Fig. 6b (n= 20 neurons per cell line).**

| Group  | Condition | Cell ID | Neurite number from soma |       | Branch number |         | Neurite length |        |
|--------|-----------|---------|--------------------------|-------|---------------|---------|----------------|--------|
|        |           |         | Average                  | SEM   | Average       | SEM     | Average        | SEM    |
| HC     | VEH       | 190     | 3.65                     | 0.23  | 7.55          | 0.41    | 522.87         | 28.31  |
|        |           | L7      | 5.00                     | 0.34  | 15.50         | 1.29    | 1137.92        | 85.95  |
|        |           | 367     | 5.35                     | 0.27  | 21.40         | 1.86    | 1545.45        | 142.76 |
|        |           | PYAUM   | 4.45                     | 0.27  | 13.60         | 1.09    | 1002.77        | 79.26  |
|        |           | 99      | 4.80                     | 0.31  | 17.45         | 1.32    | 1206.03        | 121.12 |
|        |           | 107     | 5.30                     | 0.46  | 27.60         | 3.37    | 1702.06        | 152.33 |
|        |           | M_139   | 4.85                     | 0.39  | 19.30         | 1.75    | 1332.62        | 87.85  |
|        |           | 272     | 6.40                     | 0.41  | 20.80         | 1.67    | 1303.70        | 70.48  |
|        | GO6893    | 190     | 4.25                     | 0.19  | 9.55          | 0.63    | 702.13         | 55.49  |
|        |           | L7      | 4.35                     | 0.32  | 14.05         | 1.45    | 1125.22        | 114.50 |
|        |           | 367     | 4.80                     | 0.28  | 14.80         | 0.81    | 1147.60        | 70.42  |
|        |           | PYAUM   | 5.25                     | 0.30  | 18.80         | 1.44    | 1183.03        | 117.32 |
|        |           | 99      | 5.15                     | 0.43  | 25.65         | 2.67    | 1546.61        | 103.28 |
|        |           | 107     | 4.70                     | 0.30  | 22.75         | 2.36    | 1519.27        | 126.78 |
| SCZ    | VEH       | M_139   | 4.30                     | 0.33  | 17.65         | 2.15    | 1127.31        | 76.19  |
|        |           | 272     | 6.45                     | 0.36  | 17.80         | 1.35    | 1360.84        | 75.89  |
|        |           | 689     | 3.95                     | 0.35  | 6.80          | 0.52    | 520.37         | 39.13  |
|        |           | 67      | 3.65                     | 0.24  | 6.75          | 0.66    | 463.66         | 46.65  |
|        |           | 162     | 4.45                     | 0.29  | 13.30         | 0.94    | 892.94         | 47.69  |
|        |           | 117     | 3.90                     | 0.29  | 10.35         | 1.02    | 765.52         | 68.56  |
|        |           | 285     | 4.35                     | 0.22  | 12.20         | 0.83    | 905.22         | 95.19  |
|        |           | 58      | 3.95                     | 0.31  | 15.25         | 1.55    | 1178.94        | 97.86  |
|        | GO6893    | 755     | 4.15                     | 0.39  | 14.80         | 1.32    | 1354.89        | 123.34 |
|        |           | 483     | 3.90                     | 0.24  | 10.75         | 0.91    | 921.64         | 85.74  |
|        |           | 689     | 4.65                     | 0.30  | 9.25          | 0.52    | 674.04         | 49.36  |
|        |           | 67      | 4.50                     | 0.25  | 10.25         | 0.78    | 740.41         | 58.12  |
|        |           | 162     | 4.55                     | 0.17  | 17.35         | 1.54    | 1079.18        | 88.45  |
|        |           | 117     | 4.90                     | 0.40  | 11.40         | 1.08    | 1001.52        | 84.61  |
| 285    |           | 4.70    | 0.26                     | 13.15 | 1.22          | 927.88  | 49.91          |        |
| 58     |           | 4.90    | 0.34                     | 17.05 | 1.27          | 1633.03 | 152.35         |        |
| GO6893 | 755       | 6.30    | 0.67                     | 20.55 | 2.50          | 1823.33 | 127.84         |        |
|        | 483       | 4.15    | 0.32                     | 20.55 | 2.21          | 1508.22 | 155.09         |        |



**Supplementary Table 11. Break down data table of Fig. 6c (n= 20 neurons per cell line).**

| Group | siRNA condition  | Cell ID | Neurite number from soma |      | Branch number |      | Neurite length |        |
|-------|------------------|---------|--------------------------|------|---------------|------|----------------|--------|
|       |                  |         | Average                  | SEM  | Average       | SEM  | Average        | SEM    |
| HC    | Negative control | 190     | 3.95                     | 0.26 | 14.55         | 1.24 | 852.71         | 57.52  |
|       |                  | 226     | 3.70                     | 0.26 | 15.65         | 1.08 | 998.63         | 97.99  |
|       |                  | 367     | 3.05                     | 0.26 | 8.00          | 0.63 | 1095.07        | 127.50 |
|       | PCDHA            | 190     | 3.05                     | 0.22 | 8.85          | 1.07 | 403.37         | 41.10  |
|       |                  | 226     | 3.45                     | 0.29 | 11.80         | 0.89 | 589.60         | 40.73  |
|       |                  | 367     | 2.00                     | 0.21 | 4.90          | 0.33 | 360.85         | 43.70  |
|       | PCDHG            | 190     | 2.35                     | 0.18 | 5.25          | 0.49 | 284.73         | 19.29  |
|       |                  | 226     | 2.40                     | 0.27 | 8.00          | 1.03 | 353.69         | 50.46  |
|       |                  | 367     | 2.50                     | 0.22 | 5.20          | 0.44 | 384.65         | 55.68  |
|       | PCDHA+G          | 190     | 2.90                     | 0.29 | 9.80          | 0.96 | 428.82         | 47.14  |
|       |                  | 226     | 3.65                     | 0.17 | 12.95         | 1.08 | 503.98         | 36.03  |
|       |                  | 367     | 2.40                     | 0.21 | 4.70          | 0.39 | 372.70         | 45.96  |
| SCZ   | Negative control | 212     | 3.30                     | 0.19 | 10.05         | 0.69 | 705.96         | 49.39  |
|       |                  | 128     | 2.90                     | 0.28 | 6.95          | 0.43 | 418.60         | 24.80  |
|       |                  | 162     | 3.25                     | 0.27 | 7.85          | 0.73 | 418.16         | 39.15  |
|       | PCDHA            | 212     | 3.15                     | 0.21 | 7.30          | 0.65 | 379.02         | 36.71  |
|       |                  | 128     | 3.30                     | 0.22 | 7.30          | 0.46 | 370.26         | 24.83  |
|       |                  | 162     | 2.85                     | 0.23 | 5.65          | 0.51 | 317.71         | 27.88  |
|       | PCDHG            | 212     | 3.05                     | 0.17 | 6.90          | 0.59 | 326.73         | 35.67  |
|       |                  | 128     | 2.80                     | 0.22 | 6.00          | 0.40 | 264.42         | 16.30  |
|       |                  | 162     | 2.45                     | 0.21 | 4.15          | 0.33 | 178.22         | 15.15  |
|       | PCDHA+G          | 212     | 2.20                     | 0.26 | 5.90          | 0.77 | 303.41         | 31.05  |
|       |                  | 128     | 3.00                     | 0.21 | 6.55          | 0.41 | 295.64         | 18.77  |
|       |                  | 162     | 2.25                     | 0.22 | 4.40          | 0.34 | 214.78         | 12.64  |

**Supplementary Table 12. Break down data table of Fig. 7f and g (n= two 116  $\mu\text{m}$  x 116  $\mu\text{m}$  images per cell line).**

| Group | Cell ID | Inhibitory synaptic puncta per 100 $\mu\text{m}^2$ |      | Excitatory synaptic puncta per 100 $\mu\text{m}^2$ |       |
|-------|---------|----------------------------------------------------|------|----------------------------------------------------|-------|
|       |         | Average                                            | SEM  | Average                                            | SEM   |
| HC    | 99      | 18.30                                              | 2.60 | 30.78                                              | 1.94  |
|       | 107     | 7.90                                               | 2.40 | 13.54                                              | 2.86  |
|       | 190     | 19.65                                              | 3.06 | 22.63                                              | 3.80  |
|       | 272     | 10.90                                              | 3.05 | 34.75                                              | 3.50  |
|       | 317     | 6.75                                               | 1.40 | 41.89                                              | 2.80  |
|       | PYAUM   | 14.89                                              | 1.36 | 40.82                                              | 6.18  |
|       | M_139   | 16.10                                              | 0.20 | 20.63                                              | 1.97  |
| SCZ   | 67      | 6.41                                               | 0.78 | 35.00                                              | 3.63  |
|       | 128     | 8.64                                               | 0.99 | 49.43                                              | 13.79 |
|       | 282     | 6.48                                               | 1.08 | 20.58                                              | 2.66  |
|       | 483     | 6.08                                               | 1.44 | 32.58                                              | 6.26  |
|       | 689     | 10.63                                              | 0.41 | 15.70                                              | 0.76  |
|       | 755     | 9.33                                               | 1.33 | 42.99                                              | 2.93  |
|       | L10     | 12.00                                              | 0.74 | 40.73                                              | 3.18  |

**Supplementary Table 13. Break down data table of Fig. 8b (n= 20 neurons per subject).**

| Group | Subject ID | Neurite number from soma |      | Branch number |      | Neurite length |       |
|-------|------------|--------------------------|------|---------------|------|----------------|-------|
|       |            | Average                  | SEM  | Average       | SEM  | Average        | SEM   |
| HC    | 10040      | 4.80                     | 0.22 | 17.35         | 0.75 | 413.07         | 12.80 |
|       | 10477      | 5.20                     | 0.26 | 13.55         | 0.55 | 397.84         | 12.54 |
|       | 16799      | 5.65                     | 0.23 | 12.60         | 0.34 | 379.76         | 17.63 |
|       | 8536       | 6.75                     | 0.30 | 15.40         | 0.61 | 473.15         | 16.72 |
|       | 6325       | 4.30                     | 0.19 | 16.40         | 0.87 | 724.22         | 25.32 |
|       | 4228       | 4.55                     | 0.20 | 16.30         | 0.58 | 448.35         | 15.24 |
|       | 5723       | 4.60                     | 0.22 | 16.20         | 0.58 | 408.49         | 17.61 |
|       | 13237      | 5.20                     | 0.26 | 18.70         | 0.86 | 455.27         | 14.43 |
| SCZ   | 10963      | 3.70                     | 0.23 | 11.85         | 0.60 | 253.99         | 12.61 |
|       | 853        | 3.40                     | 0.21 | 10.20         | 0.52 | 212.52         | 10.94 |
|       | 3019       | 3.50                     | 0.22 | 7.55          | 0.54 | 165.05         | 13.26 |
|       | 12413      | 3.60                     | 0.23 | 12.50         | 0.37 | 336.44         | 9.36  |
|       | 10308      | 3.70                     | 0.21 | 12.95         | 0.58 | 497.91         | 22.81 |
|       | 13097      | 4.40                     | 0.22 | 16.40         | 0.56 | 361.83         | 23.59 |
|       | 1545       | 3.85                     | 0.20 | 15.55         | 0.81 | 402.64         | 22.85 |
|       | 2464       | 3.65                     | 0.18 | 13.80         | 0.56 | 347.35         | 12.85 |

**Supplementary Table 14. Break down data table of Fig. 8c and d (n= four 116  $\mu\text{m}$  x 116  $\mu\text{m}$  images per subject).**

| Group | Subject ID | Inhibitory synaptic puncta per 100 $\mu\text{m}^2$ |      | Excitatory synaptic puncta per 100 $\mu\text{m}^2$ |      |
|-------|------------|----------------------------------------------------|------|----------------------------------------------------|------|
|       |            | Average                                            | SEM  | Average                                            | SEM  |
| HC    | 10040      | 26.74                                              | 5.62 | 16.94                                              | 2.27 |
|       | 10477      | 16.54                                              | 1.80 | 15.50                                              | 3.08 |
|       | 16799      | 30.48                                              | 0.90 | 20.05                                              | 1.72 |
|       | 8536       | 23.85                                              | 2.25 | 22.18                                              | 0.46 |
|       | 6325       | 32.45                                              | 1.78 | 22.77                                              | 1.43 |
|       | 4228       | 12.12                                              | 0.85 | 42.53                                              | 1.34 |
|       | 5723       | 21.52                                              | 1.40 | 35.93                                              | 1.74 |
|       | 13237      | 24.95                                              | 2.47 | 14.77                                              | 0.81 |
| SCZ   | 10963      | 15.36                                              | 3.51 | 9.03                                               | 1.51 |
|       | 853        | 17.69                                              | 2.30 | 15.18                                              | 2.43 |
|       | 3019       | 18.93                                              | 0.46 | 17.19                                              | 1.29 |
|       | 12413      | 20.90                                              | 0.28 | 14.71                                              | 2.11 |
|       | 10308      | 12.67                                              | 3.64 | 15.72                                              | 2.68 |
|       | 13097      | 13.41                                              | 0.66 | 16.97                                              | 1.76 |
|       | 1545       | 15.51                                              | 2.00 | 12.88                                              | 0.54 |
|       | 2464       | 12.81                                              | 1.11 | 16.94                                              | 1.20 |

**Supplementary Table 15. Summary of statistical analysis of electrophysiological data.** *Related to Figure 2 and Supplementary Fig. 3 and 5.*

| Response variable               | n (cells) |     | Shapiro-Wilk test<br>(p-value) | Data transformation | Test used (two-sided)     | p-value |
|---------------------------------|-----------|-----|--------------------------------|---------------------|---------------------------|---------|
|                                 | HC        | SCZ |                                |                     |                           |         |
| Membrane resistance             | 22        | 24  | 0.0001                         | log-transformed     | Linear Mixed Effect Model | 0.6462  |
| Membrane capacitance            | 22        | 24  | 0.0001                         | log-transformed     | Linear Mixed Effect Model | 0.8979  |
| K <sup>+</sup> current density  | 12        | 12  | 0.2864                         | untransformed       | Linear Mixed Effect Model | 0.2587  |
| Na <sup>+</sup> current density | 12        | 10  | 0.4591                         | untransformed       | Linear Mixed Effect Model | 0.1051  |
| Resting membrane potential      | 18        | 20  | 0.0046                         | log-transformed     | Linear Mixed Effect Model | 0.0465  |
| Afterhyperpolarization          | 14        | 18  | 0.6403                         | untransformed       | Linear Mixed Effect Model | 0.7822  |
| AP threshold                    | 14        | 18  | 0.8151                         | untransformed       | Linear Mixed Effect Model | 0.5417  |
| AP half-width                   | 9         | 13  | 0.1390                         | untransformed       | Linear Mixed Effect Model | 0.9117  |
| sAP frequency                   | 14        | 13  | 0.0011                         | log-transformed     | Linear Mixed Effect Model | 0.3358  |
| sEPSC frequency                 | 12        | 14  | 0.0001                         | log-transformed     | Linear Mixed Effect Model | 0.7657  |
| sEPSC amplitude                 | 12        | 14  | 0.1613                         | log-transformed     | Linear Mixed Effect Model | 0.3737  |
| IPSC amplitude                  | 15        | 13  | 0.0003                         | log-transformed     | Linear Mixed Effect Model | 0.3734  |

**Supplementary Table 16. Summary of statistical analysis of gene expression data. Related to Figure 3, 4 and Supplementary Fig. 8.**

| Sample               | Gene name       | n (differentiations) | Shapiro-Wilk's test (p-value) | data transformation | Test used (two sided)     | p-value |
|----------------------|-----------------|----------------------|-------------------------------|---------------------|---------------------------|---------|
| cIN                  | <i>PCDHA2</i>   | 12                   | 0.0100                        | log-transformed     | Linear Mixed Effect Model | 0.0179  |
| glutamatergic neuron | <i>PCDHA2</i>   | 8                    | 0.0133                        | log-transformed     | Linear Mixed Effect Model | 0.3663  |
| glutamatergic neuron | <i>PCDHA3</i>   | 8                    | 0.0520                        | untransformed       | Linear Mixed Effect Model | 0.3524  |
| glutamatergic neuron | <i>PCDHA6</i>   | 8                    | 0.0010                        | log-transformed     | Linear Mixed Effect Model | 0.9039  |
| glutamatergic neuron | <i>PCDHA8</i>   | 8                    | 0.0586                        | untransformed       | Linear Mixed Effect Model | 0.5903  |
| glutamatergic neuron | <i>PCDHA-CR</i> | 8                    | 0.0280                        | log-transformed     | Linear Mixed Effect Model | 0.5607  |
| glutamatergic neuron | <i>PCDHG-CR</i> | 8                    | 0.1824                        | untransformed       | Linear Mixed Effect Model | 0.4847  |
| cIN                  | <i>PCDHA2</i>   | 28                   | 0.0001                        | log-transformed     | Linear Mixed Effect Model | 0.0009  |
| cIN                  | <i>PCDHA3</i>   | 28                   | 0.0001                        | log-transformed     | Linear Mixed Effect Model | 0.0085  |
| cIN                  | <i>PCDHA6</i>   | 28                   | 0.0001                        | log-transformed     | Linear Mixed Effect Model | 0.0362  |
| cIN                  | <i>PCDHA8</i>   | 28                   | 0.0001                        | log-transformed     | Linear Mixed Effect Model | 0.0234  |
| cIN                  | <i>PCDHA-CR</i> | 28                   | 0.0001                        | log-transformed     | Linear Mixed Effect Model | 0.0016  |
| cIN                  | <i>PCDHG-CR</i> | 28                   | 0.0001                        | log-transformed     | Linear Mixed Effect Model | 0.0021  |

**Supplementary Table 17. Summary of statistical analysis of phenotype data. Related to Figure 5-8.**

| Data    | Experiment                      | n           | Shapiro-Wilk's test (p-value) | Data transformation | Test used (two sided)                                | p-value |
|---------|---------------------------------|-------------|-------------------------------|---------------------|------------------------------------------------------|---------|
| Fig. 5a | Neurite length                  | 100 neurons | 0.0000                        | untransformed       | Linear Mixed Effect Model                            | 0.0001  |
| Fig. 5a | Branch number                   | 100 neurons |                               |                     | Mixed Effect Log-Linear Model                        | 0.001   |
| Fig. 5a | Neurite number from soma        | 100 neurons |                               |                     | Mixed Effect Log-Linear Model                        | 0.008   |
| Fig. 5b | Inhibitory synaptic puncta      | 25 images   | 0.0000                        | untransformed       | Linear Mixed Effect Model                            | 0.0001  |
| Fig. 5c | Excitatory synaptic puncta      | 25 images   | 0.0840                        | untransformed       | Linear Mixed Effect Model                            | 0.2316  |
| Fig. 6a | Neurite length                  | 180 neurons | 0.0001                        | log-transformed     | Linear Mixed Effect Model                            | 0.0088  |
| Fig. 6a | Branch number                   | 180 neurons |                               |                     | Mixed Effect Log-Linear Model                        | 0.0049  |
| Fig. 6a | Neurite number from soma        | 180 neurons |                               |                     | Mixed Effect Log-Linear Model                        | 0.0013  |
| Fig. 6b | Neurite length of HC            | 160 neurons | 0.0001                        | log-transformed     | Two-Level Hierarchical Linear Mixed Effect Model     | 0.7024  |
| Fig. 6b | Neurite length of SCZ           | 160 neurons | 0.0001                        | log-transformed     | Two-Level Hierarchical Linear Mixed Effect Model     | 0.0001  |
| Fig. 6b | Branch number of HC             | 160 neurons |                               |                     | Two-Level Hierarchical Mixed Effect Log-Linear Model | 0.8293  |
| Fig. 6b | Branch number of SCZ            | 160 neurons |                               |                     | Two-Level Hierarchical Mixed Effect Log-Linear Model | 0.0001  |
| Fig. 6b | Neurite number from soma of HC  | 160 neurons |                               |                     | Two-Level Hierarchical Mixed Effect Log-Linear Model | 0.6545  |
| Fig. 6b | Neurite number from soma of SCZ | 160 neurons |                               |                     | Two-Level Hierarchical Mixed Effect Log-Linear Model | 0.0001  |
| Fig. 7f | Inhibitory synaptic puncta      | 14 images   | 0.0540                        | untransformed       | Linear Mixed Effect Model                            | 0.0324  |
| Fig. 7g | Excitatory synaptic puncta      | 14 images   | 0.4561                        | untransformed       | Linear Mixed Effect Model                            | 0.4679  |
| Fig. 8b | Neurite length                  | 160 neurons | 0.0001                        | log-transformed     | Linear Mixed Effect Model                            | 0.0050  |
| Fig. 8b | Branch number                   | 160 neurons |                               |                     | Mixed Effect Log-Linear Model                        | 0.0077  |
| Fig. 8b | Neurite number from soma        | 160 neurons |                               |                     | Mixed Effect Log-Linear Model                        | 0.0001  |
| Fig. 8c | Inhibitory synaptic puncta      | 32 images   | 0.0430                        | log-transformed     | Linear Mixed Effect Model                            | 0.0073  |
| Fig. 8d | Excitatory synaptic puncta      | 32 images   | 0.0001                        | log-transformed     | Linear Mixed Effect Model                            | 0.0086  |

**Supplementary Table 18. Summary of statistical analysis of phenotype data after siRNA transfection. Related to Figure 6c.**

| Experiment                      | n (neurons) | Comparison                 | Shapiro-Wilk's test (p-value) | Data transformation | Test used (two sided)                                | Adj. p-value |
|---------------------------------|-------------|----------------------------|-------------------------------|---------------------|------------------------------------------------------|--------------|
| Neurite length of HC            | 60          | Overall                    | 0.0001                        | log-transformed     | Two-Level Hierarchical Linear Mixed Effect Model     | 0.0001       |
|                                 |             | Negative Cont. vs. PCDHA   |                               |                     | Dunnett's multiple comparison test                   | 0.0001       |
|                                 |             | Negative Cont. vs. PCDHG   |                               |                     | Dunnett's multiple comparison test                   | 0.0001       |
|                                 |             | Negative Cont. vs. PCDHA+G |                               |                     | Dunnett's multiple comparison test                   | 0.0001       |
| Branch number of HC             | 60          | Overall                    |                               |                     | Two-Level Hierarchical Mixed Effect Log-Linear Model | 0.0001       |
|                                 |             | Negative Cont. vs. PCDHA   |                               |                     | Dunnett's multiple comparison test                   | 0.0001       |
|                                 |             | Negative Cont. vs. PCDHG   |                               |                     | Dunnett's multiple comparison test                   | 0.0001       |
|                                 |             | Negative Cont. vs. PCDHA+G |                               |                     | Dunnett's multiple comparison test                   | 0.0001       |
| Neurite number from soma of HC  | 60          | Overall                    |                               |                     | Two-Level Hierarchical Mixed Effect Log-Linear Model | 0.0039       |
|                                 |             | Negative Cont. vs. PCDHA   |                               |                     | Dunnett's multiple comparison test                   | 0.0698       |
|                                 |             | Negative Cont. vs. PCDHG   |                               |                     | Dunnett's multiple comparison test                   | 0.0011       |
|                                 |             | Negative Cont. vs. PCDHA+G |                               |                     | Dunnett's multiple comparison test                   | 0.1976       |
| Neurite length of SCZ           | 60          | Overall                    | 0.0001                        | log-transformed     | Two-Level Hierarchical Linear Mixed Effect Model     | 0.0001       |
|                                 |             | Negative Cont. vs. PCDHA   |                               |                     | Dunnett's multiple comparison test                   | 0.0001       |
|                                 |             | Negative Cont. vs. PCDHG   |                               |                     | Dunnett's multiple comparison test                   | 0.0001       |
|                                 |             | Negative Cont. vs. PCDHA+G |                               |                     | Dunnett's multiple comparison test                   | 0.0001       |
| Branch number of SCZ            | 60          | Overall                    |                               |                     | Two-Level Hierarchical Mixed Effect Log-Linear Model | 0.0001       |
|                                 |             | Negative Cont. vs. PCDHA   |                               |                     | Dunnett's multiple comparison test                   | 0.0072       |
|                                 |             | Negative Cont. vs. PCDHG   |                               |                     | Dunnett's multiple comparison test                   | 0.0001       |
|                                 |             | Negative Cont. vs. PCDHA+G |                               |                     | Dunnett's multiple comparison test                   | 0.0001       |
| Neurite number from soma of SCZ | 60          | Overall                    |                               |                     | Two-Level Hierarchical Mixed Effect Log-Linear Model | 0.1118       |
|                                 |             | Negative Cont. vs. PCDHA   |                               |                     | Dunnett's multiple comparison test                   | 0.9975       |
|                                 |             | Negative Cont. vs. PCDHG   |                               |                     | Dunnett's multiple comparison test                   | 0.4811       |
|                                 |             | Negative Cont. vs. PCDHA+G |                               |                     | Dunnett's multiple comparison test                   | 0.0812       |
